# Supplementary material for: Alcohol use and cardiometabolic risk in the UK Biobank: A Mendelian randomization study
Source: PubMed Central journal article supplement (PMC8357114; doi:10.1371/journal.pone.0255801), 2021-08-11
Supplement: pone.0255801.s001.pdf [file pone.0255801.s001.pdf]

**Table A. ICD codes used for disease definitions**

| Event                 | ICD-9                                    | ICD-10                             | OPCS-4                                                     |
|-----------------------|------------------------------------------|------------------------------------|------------------------------------------------------------|
| Myocardial infarction | 410*, 411*                               | I20.0, I21*, I22*                  | K40*, K41*, K42*, K43*, K44*, K45*, K46*, K49*, K50*, K75* |
| All stroke            | 430*, 431*, 432*, 433*, 434*, 435*, 436* | I60*, I61*, I62*, I63*, G45*, I64* | n/a                                                        |
| Ischemic stroke       | 433*, 434*                               | I63*                               | n/a                                                        |
| Hemorrhagic stroke    | 430*, 431*, 432*                         | I60*, I61*, I62*                   | n/a                                                        |
| Heart failure         | 428*                                     | I50*                               | n/a                                                        |
| Atrial fibrillation   | 427.3*                                   | I48*                               | K52.1, K62.2, K62.3, K62.4                                 |

\* Including all subcategories. ICD codes found in primary and secondary diagnoses were included.

### Definition of diabetes

Diabetes was defined using self-reported diabetes (question # 1221, 1222, 1223), self-reported medical conditions (question # 20002), self-reported medications (question # 20003), HbA1C results (question # 30750), age of diagnosis (question # 2976), started insulin within one year of diagnosis (question # 2986), diabetes diagnosed by a doctor (question # 2443), diabetes gestational only (question # 4041).

We flagged individuals who had suspected Type 1 diabetes. We considered individuals to have Type 2 diabetes if they were not flagged for Type 1, and any of the following was true:

- HbA1C exceeded threshold of 48 mmol/mol
- Type 2 diabetes was in their self-reported medical conditions
- Diabetes medications were self-reported
- Diabetes had been diagnosed by a doctor but was not gestational only

We flagged individuals for suspected type 1 diabetes if:

- Type 1 diabetes was in reported conditions, OR
- Diabetes was diagnosed before age 35, OR
- Insulin began within a year of diagnosis.
