# Supplementary material for: Alcohol use and cardiometabolic risk in the UK Biobank: A Mendelian randomization study
Source: PubMed Central journal article supplement (PMC8357114; doi:10.1371/journal.pone.0255801), 2021-08-11
Supplement: pone.0255801.s003.pdf [file pone.0255801.s003.pdf]

1 All SNPs with an association with the AUDIT-C score or with Alcohol Use Disorder were  
2 assessed as potential instrument variables for alcohol use. We calculated the association between  
3 each SNP and alcohol consumption in the UK Biobank, adjusted for age at censoring (age when  
4 the data was extracted or death) and sex. Given that the phenotypes were not an exact match, we  
5 chose a generous cutoff of  $p = 0.5$  for instruments to include in the analysis. Associations were  
6 similarly calculated between each SNP and outcome, age and sex adjusted. Associations between  
7 SNPs and lipids were also adjusted lipid-lowering medications, associations between SNPs and  
8 blood pressure were also adjusted for antihypertensive medications, and associations between  
9 SNPs and HbA1C were also adjusted for diabetes medications.

**Table A. Variants from Million Veterans Program (MVP) evaluated for alcohol use association in UK Biobank (UKB).**

| <b>rsID</b> | <b>chr</b> | <b>pos</b> | <b>A1 UKB</b> | <b>A1 freq UKB</b> | <b>Beta for A1 UKB</b> | <b>SE UKB</b> | <b>P UKB</b> | <b>L95 UKB</b> | <b>U95 UKB</b> | <b>Allele raising alcohol use MVP</b> | <b>Beta in UKB for the allele raising alcohol use in MVP</b> | <b>Included in IV</b> |
|-------------|------------|------------|---------------|--------------------|------------------------|---------------|--------------|----------------|----------------|---------------------------------------|--------------------------------------------------------------|-----------------------|
| rs1260326   | 2          | 27730940   | T             | 0.39277            | -0.05430               | 0.00460       | 3.55E-32     | -0.06331       | -0.04529       | C                                     | 0.05430                                                      | Yes                   |
| rs570436    | 2          | 45142673   | C             | 0.44368            | -0.03307               | 0.00481       | 6.44E-12     | -0.04250       | -0.02363       | T                                     | 0.03307                                                      | Yes                   |
| rs2717071   | 2          | 58030962   | G             | 0.37221            | -0.01952               | 0.00455       | 1.76E-05     | -0.02842       | -0.01061       | A                                     | 0.01952                                                      | Yes                   |
| rs12639940  | 4          | 39420981   | G             | 0.37178            | -0.06227               | 0.00456       | 2.24E-42     | -0.07121       | -0.05332       | A                                     | 0.06227                                                      | Yes                   |
| rs2141284   | 4          | 99704167   | A             | 0.00596            | -0.29542               | 0.02102       | 7.43E-45     | -0.33662       | -0.25423       | G                                     | 0.29542                                                      | Yes                   |
| rs1154431   | 4          | 100155470  | G             | 0.04494            | -0.04624               | 0.00779       | 2.88E-09     | -0.06151       | -0.03098       | A                                     | 0.04624                                                      | Yes                   |
| rs1229984   | 4          | 100239319  | T             | 0.02245            | -0.31028               | 0.01077       | 2.32E-182    | -0.33138       | -0.28917       | C                                     | 0.31028                                                      | Yes                   |
| rs1154433   | 4          | 100253708  | G             | 0.41821            | 0.03710                | 0.00469       | 2.49E-15     | 0.02791        | 0.04628        | G                                     | 0.03710                                                      | Yes                   |
| rs1229978   | 4          | 100256199  | C             | 0.41769            | 0.03720                | 0.00468       | 2.03E-15     | 0.02802        | 0.04638        | C                                     | 0.03720                                                      | Yes                   |
| rs78111280  | 4          | 100421822  | T             | 0.07261            | -0.02908               | 0.00640       | 5.52E-06     | -0.04162       | -0.01654       | C                                     | 0.02908                                                      | Yes                   |
| rs57370858  | 4          | 100601316  | T             | 0.05476            | -0.02669               | 0.00721       | 2.14E-04     | -0.04082       | -0.01256       | A                                     | 0.02669                                                      | Yes                   |
| rs140280172 | 4          | 100832564  | A             | 0.00464            | -0.25273               | 0.02355       | 7.39E-27     | -0.29889       | -0.20657       | C                                     | 0.25273                                                      | Yes                   |
| rs150021439 | 4          | 100919254  | T             | 0.00456            | -0.25558               | 0.02399       | 1.67E-26     | -0.30259       | -0.20856       | C                                     | 0.25558                                                      | Yes                   |
| rs186613142 | 4          | 101546509  | A             | 0.00186            | -0.22456               | 0.03859       | 5.91E-09     | -0.30019       | -0.14893       | G                                     | 0.22456                                                      | Yes                   |
| rs13107325  | 4          | 103188709  | T             | 0.07479            | -0.05466               | 0.00632       | 5.07E-18     | -0.06704       | -0.04228       | C                                     | 0.05466                                                      | Yes                   |
| rs62339861  | 4          | 150983421  | T             | 0.22171            | -0.00470               | 0.00455       | 0.301        | -0.01361       | 0.00421        | C                                     | 0.00470                                                      | Yes                   |
| rs2961817   | 5          | 50443063   | G             | 0.34490            | -0.00645               | 0.00449       | 0.151        | -0.01526       | 0.00235        | A                                     | 0.00645                                                      | Yes                   |
| rs185177474 | 5          | 143889333  | A             | 0.04266            | 0.02527                | 0.00820       | 2.07E-03     | 0.00919        | 0.04135        | A                                     | 0.02527                                                      | Yes                   |
| rs4715221   | 6          | 51359803   | G             | 0.31079            | -0.01275               | 0.00445       | 4.13E-03     | -0.02146       | -0.00404       | A                                     | 0.01275                                                      | Yes                   |
| rs141424017 | 7          | 114951430  | T             | 0.22675            | -0.00048               | 0.00455       | 0.915        | -0.00940       | 0.00843        | T                                     | -0.00048                                                     | No                    |
| rs17125651  | 10         | 110823083  | C             | 0.12804            | 0.00347                | 0.00520       | 0.505        | -0.00673       | 0.01367        | C                                     | 0.00347                                                      | No                    |

|            |    |           |   |         |          |         |          |          |          |   |         |     |
|------------|----|-----------|---|---------|----------|---------|----------|----------|----------|---|---------|-----|
| rs4936277  | 11 | 113431960 | G | 0.45463 | -0.02129 | 0.00490 | 1.41E-05 | -0.03091 | -0.01168 | A | 0.02129 | Yes |
| rs12425096 | 12 | 51980459  | C | 0.22154 | -0.00893 | 0.00454 | 0.0494   | -0.01784 | -0.00002 | A | 0.00893 | Yes |
| rs11075992 | 16 | 53820066  | C | 0.39332 | -0.02516 | 0.00460 | 4.60E-08 | -0.03418 | -0.01614 | T | 0.02516 | Yes |
| rs9937709  | 16 | 53820813  | G | 0.41278 | -0.02497 | 0.00467 | 8.94E-08 | -0.03413 | -0.01582 | A | 0.02497 | Yes |
| rs4794018  | 17 | 47093398  | C | 0.35500 | 0.01858  | 0.00451 | 3.75E-05 | 0.00975  | 0.02742  | C | 0.01858 | Yes |
| rs35572189 | 17 | 79419025  | A | 0.36136 | 0.02247  | 0.00453 | 7.04E-07 | 0.01359  | 0.03135  | A | 0.02247 | Yes |

Betas show association with daily wine equivalents in UKB. Chr = chromosome; pos = numeric position within chromosome; A = allele; beta = effect size from regression; SE = standard deviation; p = p-value; L95 = lower limit of 95% confidence interval; U95 = upper limit of 95% confidence interval; IV = instrument variable.
