# Supplementary material for: Alcohol use and cardiometabolic risk in the UK Biobank: A Mendelian randomization study
Source: PubMed Central journal article supplement (PMC8357114; doi:10.1371/journal.pone.0255801), 2021-08-11
Supplement: pone.0255801.s004.pdf [file pone.0255801.s004.pdf]

1 **Table A. Observational analysis results (betas and 95% confidence intervals) for continuous outcomes for partially adjusted**  
 2 **model.**

| Glasses/day | SBP**               | DBP**                  | BMI**                  | WAIST**                | BFP**                  | CHOL**              | LDL**               | HDL**               | TG**                   | HBA1C**                |
|-------------|---------------------|------------------------|------------------------|------------------------|------------------------|---------------------|---------------------|---------------------|------------------------|------------------------|
| >0-1        | 0.22<br>(0.07,0.36) | -0.010<br>(-0.09,0.07) | -1.17<br>(-1.21,-1.14) | -2.66<br>(-2.74,-2.57) | -1.11<br>(-1.15,-1.06) | 0.11<br>(0.10,0.12) | 0.03<br>(0.02,0.04) | 0.11<br>(0.10,0.11) | -0.14<br>(-0.14,-0.13) | -0.99<br>(-1.04,-0.94) |
| >1-2        | 1.02<br>(0.86,1.18) | 0.72<br>(0.62,0.81)    | -1.40<br>(-1.44,-1.36) | -3.03<br>(-3.13,-2.93) | -1.31<br>(-1.36,-1.25) | 0.19<br>(0.18,0.20) | 0.03<br>(0.02,0.03) | 0.20<br>(0.20,0.21) | -0.19<br>(-0.20,-0.18) | -1.60<br>(-1.66,-1.55) |
| >2-3        | 3.13<br>(2.92,3.34) | 2.06<br>(1.94,2.18)    | -1.07<br>(-1.12,-1.02) | -2.06<br>(-2.19,-1.93) | -0.79<br>(-0.86,-0.72) | 0.28<br>(0.27,0.29) | 0.05<br>(0.04,0.06) | 0.26<br>(0.26,0.27) | -0.16<br>(-0.17,-0.15) | -1.82<br>(-1.89,-1.74) |
| >3          | 6.28<br>(6.05,6.51) | 3.85<br>(3.72,3.98)    | -0.69<br>(-0.74,-0.63) | -0.74<br>(-0.88,-0.59) | -0.18<br>(-0.25,-0.10) | 0.40<br>(0.39,0.41) | 0.07<br>(0.06,0.08) | 0.34<br>(0.34,0.35) | -0.08<br>(-0.09,-0.06) | -1.86<br>(-1.94,-1.78) |

3  
 4 **Table B. Observational analysis results (betas and 95% confidence intervals) for continuous outcomes for fully adjusted**  
 5 **model.**

| Glasses/day | SBP**               | DBP**               | BMI**                  | WAIST**                | BFP**                  | CHOL**              | LDL**                | HDL**               | TG**                   | HBA1C**                |
|-------------|---------------------|---------------------|------------------------|------------------------|------------------------|---------------------|----------------------|---------------------|------------------------|------------------------|
| >0-1        | 0.72<br>(0.56,0.87) | 0.48<br>(0.39,0.56) | -0.54<br>(-0.57,-0.50) | -0.97<br>(-1.06,-0.88) | -0.35<br>(-0.39,-0.30) | 0.07<br>(0.06,0.08) | 0.01<br>(0.00,0.02)  | 0.08<br>(0.07,0.08) | -0.07<br>(-0.08,-0.06) | -0.34<br>(-0.38,-0.29) |
| >1-2        | 1.37<br>(1.19,1.55) | 1.21<br>(1.11,1.31) | -0.39<br>(-0.43,-0.35) | -0.32<br>(-0.43,-0.22) | -0.10<br>(-0.15,-0.04) | 0.13<br>(0.12,0.14) | 0.00<br>(-0.01,0.00) | 0.16<br>(0.16,0.17) | -0.11<br>(-0.12,-0.10) | -0.70<br>(-0.75,-0.65) |
| >2-3        | 2.91<br>(2.67,3.14) | 2.17<br>(2.04,2.30) | 0.00<br>(-0.06,0.05)   | 0.87<br>(0.74,1.00)    | 0.49<br>(0.42,0.57)    | 0.21<br>(0.20,0.22) | 0.01<br>(0.00,0.01)  | 0.23<br>(0.23,0.24) | -0.11<br>(-0.12,-0.10) | -0.91<br>(-0.98,-0.85) |
| >3          | 5.01<br>(4.76,5.26) | 3.39<br>(3.24,3.53) | 0.43<br>(0.37,0.49)    | 2.38<br>(2.23,2.52)    | 1.16<br>(1.08,1.24)    | 0.32<br>(0.30,0.33) | 0.02<br>(0.01,0.03)  | 0.32<br>(0.32,0.32) | -0.06<br>(-0.08,-0.05) | -1.10<br>(-1.17,-1.02) |

6

7

8 **Table C. Observational analysis results (odds ratios and 95% confidence intervals) for type 2 diabetes for partially adjusted**  
9 **model.**

| <b>glasses/day</b> | <b>T2D**</b>     |
|--------------------|------------------|
| >0-1               | 0.59 (0.57,0.61) |
| >1-2               | 0.44 (0.42,0.46) |
| >2-3               | 0.43 (0.4,0.45)  |
| >3                 | 0.47 (0.45,0.5)  |

10

11

12 **Table D. Observational analysis results (odds ratios and confidence intervals) for type 2 diabetes for fully adjusted model.**

| <b>glasses/day</b> | <b>T2D**</b>     |
|--------------------|------------------|
| >0-1               | 0.81 (0.77,0.84) |
| >1-2               | 0.69 (0.65,0.73) |
| >2-3               | 0.68 (0.63,0.73) |
| >3                 | 0.75 (0.7,0.81)  |

13

**Table E. Observational analysis results (hazard ratios and 95% confidence intervals) for disease events for partially adjusted model.**

| <b>glasses/day</b> | <b>MI**</b>         | <b>ALLSTROKE**</b>  | <b>ISTROKE**</b>    | <b>HSTROKE*</b>     | <b>HF**</b>         | <b>AFIB**</b>       | <b>CVD**</b>        | <b>Death**</b>      |
|--------------------|---------------------|---------------------|---------------------|---------------------|---------------------|---------------------|---------------------|---------------------|
| >0-1               | 0.80<br>(0.76,0.84) | 0.89<br>(0.84,0.95) | 0.85<br>(0.78,0.93) | 0.93<br>(0.82,1.05) | 0.69<br>(0.64,0.74) | 0.88<br>(0.84,0.92) | 0.83<br>(0.81,0.86) | 0.77<br>(0.74,0.80) |
| >1-2               | 0.70<br>(0.66,0.74) | 0.83<br>(0.78,0.89) | 0.86<br>(0.78,0.95) | 0.79<br>(0.68,0.92) | 0.61<br>(0.56,0.66) | 0.89<br>(0.85,0.94) | 0.78<br>(0.75,0.80) | 0.71<br>(0.68,0.74) |
| >2-3               | 0.68<br>(0.63,0.72) | 0.79<br>(0.72,0.87) | 0.75<br>(0.65,0.86) | 0.93<br>(0.77,1.12) | 0.63<br>(0.57,0.70) | 0.94<br>(0.88,0.99) | 0.79<br>(0.75,0.82) | 0.71<br>(0.67,0.75) |
| >3                 | 0.69<br>(0.65,0.74) | 0.98<br>(0.90,1.08) | 1.00<br>(0.88,1.14) | 1.07<br>(0.88,1.29) | 0.75<br>(0.68,0.83) | 1.10<br>(1.04,1.17) | 0.88<br>(0.85,0.92) | 0.91<br>(0.87,0.96) |

**Table F. Observational analysis results (hazard ratios and 95% confidence intervals) for disease events for fully adjusted model.**

| <b>glasses/day</b> | <b>MI**</b>         | <b>ALLSTROKE**</b>  | <b>ISTROKE*</b>     | <b>HSTROKE*</b>     | <b>HF**</b>         | <b>AFIB**</b>       | <b>CVD**</b>        | <b>Death**</b>      |
|--------------------|---------------------|---------------------|---------------------|---------------------|---------------------|---------------------|---------------------|---------------------|
| >0-1               | 0.89<br>(0.84,0.95) | 0.91<br>(0.85,0.98) | 0.87<br>(0.78,0.97) | 0.91<br>(0.78,1.06) | 0.81<br>(0.74,0.88) | 0.98<br>(0.93,1.03) | 0.91<br>(0.88,0.95) | 0.80<br>(0.76,0.84) |
| >1-2               | 0.82<br>(0.77,0.88) | 0.87<br>(0.80,0.95) | 0.93<br>(0.82,1.05) | 0.76<br>(0.63,0.91) | 0.73<br>(0.66,0.81) | 1.00<br>(0.95,1.07) | 0.87<br>(0.84,0.91) | 0.77<br>(0.73,0.82) |
| >2-3               | 0.81<br>(0.74,0.88) | 0.85<br>(0.76,0.95) | 0.81<br>(0.69,0.95) | 1.00<br>(0.80,1.24) | 0.78<br>(0.68,0.88) | 1.04<br>(0.97,1.12) | 0.89<br>(0.85,0.93) | 0.78<br>(0.73,0.84) |
| >3                 | 0.85<br>(0.78,0.92) | 1.02<br>(0.91,1.14) | 1.04<br>(0.89,1.22) | 1.00<br>(0.79,1.26) | 0.91<br>(0.80,1.03) | 1.20<br>(1.11,1.29) | 0.99<br>(0.94,1.05) | 1.04<br>(0.97,1.11) |

Reference for all: no alcohol consumption.

Multiple comparisons corrections with ANOVA:

\* = significant for alcohol consumption via Holm method, \*\* = also significant with Bonferroni correction. All results are compared to a reference of no alcohol consumption. Betas and (95% confidence intervals).

Abbreviations:

SBP: Systolic blood pressure (mmHg)

DBP: Diastolic blood pressure (mmHg)

BMI: Body mass index ( $\text{kg}/\text{m}^2$ )

WAIST: Waist circumference (cm)

BFP: Body fat percentage

CHOL: Cholesterol (mmol/L)

LDL: Low-density lipoprotein (mmol/L)

HDL: High-density lipoprotein (mmol/L)

TG: Triglycerides (mmol/L)

HBA1C: Glycated hemoglobin (mmol/mol)

T2D: type 2 diabetes

MI: myocardial infarction

ALLSTROKE: all types of stroke

ISTROKE: ischemic stroke

HSTROKE: hemorrhagic stroke

HF: heart failure

AFIB: atrial fibrillation

CVD: any cardiovascular disease (MI, ALLSTROKE, ISTROKE, HSTROKE, HF, AFIB)

Death: all-cause death
