# Supplementary material for: Alcohol use and cardiometabolic risk in the UK Biobank: A Mendelian randomization study
Source: PubMed Central journal article supplement (PMC8357114; doi:10.1371/journal.pone.0255801), 2021-08-11
Supplement: pone.0255801.s005.pdf [file pone.0255801.s005.pdf]

1 **Table A. Blood pressure and anthropometric outcomes**

| Outcome                              | Beta [95% CI]       | # SNPs in IV |
|--------------------------------------|---------------------|--------------|
| Systolic blood pressure (mmHg)       |                     |              |
| UKB, 2SLS                            | 3.34 [ 2.34, 4.34]  | 1            |
| UKB, IVW                             | 2.65 [ 1.40, 3.89]  | 25           |
| UKB, MVMR                            | 2.59 [ 1.39, 3.79]  | 25           |
| FinnMetSeq, 2SLS                     | -0.08 [-0.56, 0.40] | 1            |
| ICBP, IVW                            | 1.24 [-2.81, 5.29]  | 9*           |
| Diastolic blood pressure (mmHg)      |                     |              |
| UKB, 2SLS                            | 0.51 [-0.06, 1.08]  | 1            |
| UKB, IVW                             | 1.12 [ 0.34, 1.91]  | 25           |
| UKB, MVMR                            | 1.11 [ 0.32, 1.91]  | 25           |
| FinnMetSeq, 2SLS                     | -0.34 [-0.82, 0.14] | 1            |
| ICBP, IVW                            | 1.58 [-0.90, 4.07]  | 9*           |
| Body mass index (kg/m <sup>2</sup> ) |                     |              |
| UKB, 2SLS                            | 0.90 [ 0.65, 1.15]  | 1            |
| UKB, IVW                             | 0.15 [-1.00, 1.29]  | 25           |
| GIANT 2018 exome, 2SLS               | 0.03 [-0.11, 0.18]  | 1            |
| GIANT 2012, IVW                      | 0.01 [-0.11, 0.13]  | 9*           |
| Body fat percentage                  |                     |              |
| UKB, 2SLS                            | 1.31 [ 0.97, 1.64]  | 1            |
| UKB, IVW                             | 0.60 [-0.57, 1.76]  | 25           |
| BFP GWAS, 2SLS                       | -0.07 [-0.26, 0.13] | 1            |
| BFP GWAS, IVW                        | 0.00 [-0.19, 0.19]  | 9*           |
| Waist circumference (cm)             |                     |              |
| UKB, 2SLS                            | 1.87 [ 1.24, 2.50]  | 1            |
| UKB, IVW                             | 0.58 [-1.85, 3.01]  | 25           |
| EXTEND, 2SLS                         | 0.46 [ 0.13, 0.79]  | 1            |
| GIANT 2015, IVW                      | 0.04 [-0.12, 0.19]  | 9*           |

2 Beta and 95% confidence interval (CI) for one additional drink per day of alcohol, and number  
 3 of SNPs in instrumental variable (IV). \* indicates the main SNP, rs1229984, was not available in  
 4 this dataset.  
 5

6 **Table B. Serum biomarkers**

| Outcome              | Beta [95% CI]       | # SNPs in IV |
|----------------------|---------------------|--------------|
| Cholesterol (mmol/L) |                     |              |
| UKB, 2SLS            | 0.21 [ 0.15, 0.27]  | 1            |
| UKB, IVW             | 0.12 [-0.06, 0.31]  | 25           |
| UKB, MVMR            | 0.13 [-0.06, 0.32]  | 25           |
| GLGC 2017, 2SLS      | -0.04 [-0.33, 0.25] | 1            |
| GLGC 2013, IVW       | -0.36 [-0.73, 0.01] | 10*          |
| LDL (mmol/L)         |                     |              |
| UKB, 2SLS            | 0.20 [ 0.15, 0.24]  | 1            |
| UKB, IVW             | 0.12 [ 0.00, 0.25]  | 25           |

|                        |                      |     |
|------------------------|----------------------|-----|
| UKB, MVMR              | 0.12 [-0.01, 0.25]   | 25  |
| GLGC 2017, 2SLS        | 0.00 [-0.29, 0.30]   | 1   |
| GLGC 2013, IVW         | -0.14 [-0.32, 0.04]  | 10* |
| HDL (mmol/L)           |                      |     |
| UKB, 2SLS              | 0.00 [-0.02, 0.02]   | 1   |
| UKB, IVW               | 0.02 [-0.03, 0.07]   | 25  |
| UKB, MVMR              | 0.03 [-0.02, 0.07]   | 25  |
| GLGC 2017, 2SLS        | 0.20 [-0.09, 0.49]   | 1   |
| GLGC 2013, IVW         | 0.24 [0.00, 0.49]    | 10* |
| Triglycerides (mmol/L) |                      |     |
| UKB, 2SLS              | -0.05 [-0.10, 0.01]  | 1   |
| UKB, IVW               | -0.17 [-0.41, 0.07]  | 25  |
| UKB, MVMR              | -0.17 [-0.41, 0.08]  | 25  |
| GLGC 2017, 2SLS        | -0.26 [-0.55, 0.03]  | 1   |
| GLGC 2013, IVW         | -0.96 [-1.61, -0.31] | 10* |
| HbA1C (mmol/mol)       |                      |     |
| UKB, 2SLS              | -0.41 [-0.70, -0.13] | 1   |
| UKB, IVW               | -0.28 [-0.74, 0.19]  | 25  |
| EXTEND, 2SLS           | -0.27 [-0.80, 0.25]  | 1   |
| MAGIC, IVW             | 0.00 [-0.07, 0.06]   | 9*  |

7 Beta and 95% confidence interval (CI) for one additional drink per day of alcohol, and number  
8 of SNPs in instrumental variable (IV). \* indicates the main SNP, rs1229984, was not available in  
9 this dataset.  
10

11 **Table C. Binary variable outcomes**

| Outcome                 | OR [95% CI]       | # SNPs in IV |
|-------------------------|-------------------|--------------|
| Myocardial infarction   |                   |              |
| UKB, 2SLS               | 1.67 [1.28, 2.18] | 1            |
| UKB, IVW                | 1.29 [1.09, 1.51] | 25           |
| UKB, MVMR               | 1.10 [0.88, 1.36] | 25           |
| CARDIoGRAMplusC4D, 2SLS | 1.10 [0.97, 1.26] | 1            |
| CARDIoGRAMplusC4D, IVW  | 1.07 [0.92, 1.26] | 18           |
| Stroke                  |                   |              |
| UKB, 2SLS               | 1.61 [1.12, 2.33] | 1            |
| UKB, IVW                | 1.54 [1.22, 1.95] | 25           |
| UKB, MVMR               | 1.42 [1.04, 1.94] | 25           |
| MEGASTROKE, 2SLS        | 1.03 [0.86, 1.23] | 1            |
| MEGASTROKE, IVW         | 1.01 [0.91, 1.12] | 25           |
| Ischemic stroke         |                   |              |
| UKB, 2SLS               | 1.43 [0.83, 2.47] | 1            |
| UKB, IVW                | 1.15 [0.80, 1.65] | 25           |

|                                  |                   |    |
|----------------------------------|-------------------|----|
| MEGASTROKE, 2SLS                 | 1.03 [0.85, 1.25] | 1  |
| MEGASTROKE, IVW                  | 1.01 [0.90, 1.13] | 25 |
| Hemorrhagic stroke               |                   |    |
| UKB, 2SLS                        | 1.86 [0.86, 4.02] | 1  |
| UKB, IVW                         | 2.25 [1.41, 3.60] | 25 |
| UKB, MVMR                        | 2.37 [1.30, 4.30] | 25 |
| Heart failure                    |                   |    |
| UKB, 2SLS                        | 1.63 [1.06, 2.50] | 1  |
| UKB, IVW                         | 1.25 [0.90, 1.73] | 25 |
| UKB, MVMR                        | 1.03 [0.75, 1.41] | 25 |
| HERMES, 2SLS                     | 1.13 [0.95, 1.35] | 1  |
| HERMES, IVW                      | 0.93 [0.73, 1.20] | 23 |
| Atrial fibrillation              |                   |    |
| UKB, 2SLS                        | 1.40 [1.08, 1.83] | 1  |
| UKB, IVW                         | 1.26 [1.07, 1.48] | 25 |
| UKB, MVMR                        | 1.24 [1.00, 1.54] | 25 |
| AF HRC 2018, 2SLS                | 1.08 [0.96, 1.21] | 1  |
| AF HRC 2018, IVW                 | 1.07 [0.95, 1.19] | 24 |
| Type 2 diabetes                  |                   |    |
| UKB, 2SLS                        | 1.35 [1.04, 1.76] | 1  |
| UKB, IVW                         | 1.24 [0.75, 2.04] | 25 |
| UKB, MVMR                        | 1.18 [0.93, 1.50] | 25 |
| DIAMANTE exome T2D, 2SLS         | 1.29 [0.79, 2.10] | 1  |
| DIAMANTE exome T2D adj BMI, 2SLS | 1.02 [0.62, 1.69] | 1  |
| DIAGRAM GWAS, 2SLS               | 0.93 [0.74, 1.16] | 1  |
| DIAGRAM GWAS, IVW                | 0.83 [0.54, 1.27] | 25 |
| Any cardiovascular disease       |                   |    |
| UKB, 2SLS                        | 1.60 [1.33, 1.92] | 1  |
| UKB, IVW                         | 1.38 [1.21, 1.57] | 25 |
| All-cause death                  |                   |    |
| UKB, 2SLS                        | 1.44 [1.09, 1.90] | 1  |
| UKB, IVW                         | 1.31 [1.08, 1.59] | 25 |

12 Odds ratio (OR) and 95% confidence interval (CI) for one additional drink per day of alcohol,  
13 and number of SNPs in instrumental variable (IV). \* indicates the main SNP, rs1229984, was not  
14 available in this dataset.

15

16

17

18 **Table D. Risk factor outcome MVMR results**

| <b>Outcome</b>                         | <b>Beta</b> | <b>LCL</b> | <b>UCL</b> |
|----------------------------------------|-------------|------------|------------|
| <b>Cholesterol (mmol/L)</b>            |             |            |            |
| Alcohol (per +1 drink/day)             | 0.128       | -0.063     | 0.320      |
| BMI (kg/m <sup>2</sup> )               | -0.025      | -0.091     | 0.042      |
| <b>LDL (mmol/L)</b>                    |             |            |            |
| Alcohol (per +1 drink/day)             | 0.123       | -0.005     | 0.251      |
| BMI (kg/m <sup>2</sup> )               | -0.005      | -0.050     | 0.040      |
| <b>HDL (mmol/L)</b>                    |             |            |            |
| Alcohol (per +1 drink/day)             | 0.026       | -0.019     | 0.071      |
| BMI (kg/m <sup>2</sup> )               | -0.023      | -0.039     | -0.007     |
| <b>Triglycerides (mmol/L)</b>          |             |            |            |
| Alcohol (per +1 drink/day)             | -0.170      | -0.415     | 0.075      |
| BMI (kg/m <sup>2</sup> )               | 0.006       | -0.079     | 0.092      |
| <b>Systolic blood pressure (mmHg)</b>  |             |            |            |
| Alcohol (per +1 drink/day)             | 2.590       | 1.391      | 3.788      |
| BMI (kg/m <sup>2</sup> )               | 0.373       | -0.047     | 0.792      |
| <b>Diastolic blood pressure (mmHg)</b> |             |            |            |
| Alcohol (per +1 drink/day)             | 1.115       | 0.315      | 1.915      |
| BMI (kg/m <sup>2</sup> )               | 0.062       | -0.218     | 0.342      |

19 Beta, 95% lower confidence limit (LCL), and 95% upper confidence limit (UCL) for outcomes  
 20 with positive findings in the 2SLS or inverse variance weighted Mendelian randomization  
 21 analyses.

22  
 23

24 **Table E. Disease outcome MVMR results**

| <b>Outcome</b>                 | <b>OR</b> | <b>LCL</b> | <b>UCL</b> |
|--------------------------------|-----------|------------|------------|
| <b>Myocardial infarction</b>   |           |            |            |
| Alcohol (per +1 drink/day)     | 1.10      | 0.88       | 1.36       |
| Systolic blood pressure (mmHg) | 1.04      | 0.98       | 1.11       |
| Smoking (ever/never)           | 1.35      | 0.77       | 2.37       |
| LDL (mmol/L)                   | 1.28      | 0.69       | 2.36       |
| <b>All Stroke</b>              |           |            |            |
| Alcohol (per +1 drink/day)     | 1.42      | 1.04       | 1.94       |
| Systolic blood pressure (mmHg) | 1.04      | 0.95       | 1.13       |
| Smoking (ever/never)           | 0.64      | 0.28       | 1.45       |
| LDL (mmol/L)                   | 1.10      | 0.45       | 2.68       |
| <b>Hemorrhagic Stroke</b>      |           |            |            |
| Alcohol (per +1 drink/day)     | 2.37      | 1.30       | 4.30       |
| Systolic blood pressure (mmHg) | 0.98      | 0.85       | 1.13       |
| <b>Atrial fibrillation</b>     |           |            |            |
| Alcohol (per +1 drink/day)     | 1.24      | 1.00       | 1.54       |
| Systolic blood pressure (mmHg) | 1.00      | 0.95       | 1.06       |
| BMI (kg/m <sup>2</sup> )       | 1.05      | 0.99       | 1.11       |
| <b>Type 2 diabetes</b>         |           |            |            |
| Alcohol (per +1 drink/day)     | 1.18      | 0.93       | 1.50       |
| BMI (kg/m <sup>2</sup> )       | 1.46      | 1.35       | 1.59       |

25 Odds ratio (OR), 95% lower confidence limit (LCL), and 95% upper confidence limit (UCL) for  
 26 outcomes with positive findings in the 2SLS or inverse variance weighted Mendelian  
 27 randomization analyses.

28 **Table F. IVW MR stratified analysis for continuous variables**

| <b>Outcome</b>                       | <b>Male</b>         | <b>Female</b>        | <b>p value<br/>sex<br/>difference</b> | <b>Never smokers</b> | <b>Current smokers</b> | <b>p value<br/>smoking<br/>difference</b> |
|--------------------------------------|---------------------|----------------------|---------------------------------------|----------------------|------------------------|-------------------------------------------|
| Systolic blood pressure (mmHg)       | 2.62 [ 1.66, 3.58]  | 2.84 [ 0.61, 5.06]   | 0.86                                  | 2.23 [ 0.93, 3.52]   | 2.71 [ 1.20, 4.23]     | 0.63                                      |
| Diastolic blood pressure (mmHg)      | 1.23 [ 0.63, 1.83]  | 0.91 [-0.44, 2.26]   | 0.67                                  | 1.37 [ 0.45, 2.30]   | 1.59 [ 0.69, 2.49]     | 0.74                                      |
| Body mass index (kg/m <sup>2</sup> ) | 0.18 [-0.69, 1.05]  | 0.26 [-1.44, 1.97]   | 0.93                                  | 0.28 [-0.88, 1.44]   | 0.15 [-0.86, 1.16]     | 0.87                                      |
| Body fat percentage                  | 0.56 [-0.35, 1.48]  | 0.79 [-0.93, 2.51]   | 0.82                                  | 0.67 [-0.55, 1.89]   | 0.68 [-0.30, 1.65]     | 0.99                                      |
| Waist circumference                  | 0.60 [-1.37, 2.58]  | 0.82 [-2.62, 4.26]   | 0.92                                  | 0.64 [-1.82, 3.11]   | 0.69 [-1.39, 2.76]     | 0.98                                      |
| Cholesterol (mmol/L)                 | 0.17 [ 0.01, 0.32]  | 0.04 [-0.24, 0.31]   | 0.42                                  | 0.08 [-0.14, 0.29]   | 0.07 [-0.05, 0.20]     | 0.99                                      |
| LDL (mmol/L)                         | 0.14 [ 0.04, 0.24]  | 0.07 [-0.12, 0.26]   | 0.51                                  | 0.09 [-0.05, 0.23]   | 0.06 [-0.02, 0.13]     | 0.70                                      |
| HDL (mmol/L)                         | 0.03 [-0.01, 0.06]  | 0.01 [-0.07, 0.10]   | 0.74                                  | 0.01 [-0.05, 0.06]   | 0.07 [ 0.04, 0.10]     | 0.06                                      |
| Triglycerides (mmol/L)               | -0.13 [-0.33, 0.08] | -0.23 [-0.55, 0.08]  | 0.59                                  | -0.14 [-0.40, 0.12]  | -0.24 [-0.41, -0.07]   | 0.54                                      |
| HbA1C (mmol/mol)                     | -0.11 [-0.60, 0.37] | -0.52 [-1.00, -0.05] | 0.24                                  | -0.40 [-0.98, 0.18]  | -0.45 [-0.86, -0.05]   | 0.89                                      |

29 Betas and 95% confidence intervals for strata and p-values for Cochran's Q test for heterogeneity between strata pairs (male/female  
 30 and never smokers/current smokers)

31

32 **Table G. 2SLS MR stratified analysis for continuous variables**

| <b>Outcome</b>                       | <b>Male</b>         | <b>Female</b>        | <b>p value<br/>sex<br/>difference</b> | <b>Never smokers</b> | <b>Current smokers</b> | <b>p value<br/>smoking<br/>difference</b> |
|--------------------------------------|---------------------|----------------------|---------------------------------------|----------------------|------------------------|-------------------------------------------|
| Systolic blood pressure (mmHg)       | 2.95 [ 1.86, 4.05]  | 4.10 [ 2.22, 5.97]   | 0.30                                  | 2.73 [ 1.19, 4.28]   | 3.01 [ 1.03, 4.98]     | 0.83                                      |
| Diastolic blood pressure (mmHg)      | 0.68 [ 0.03, 1.33]  | 0.29 [-0.75, 1.34]   | 0.54                                  | 0.45 [-0.44, 1.33]   | 1.54 [ 0.38, 2.70]     | 0.14                                      |
| Body mass index (kg/m <sup>2</sup> ) | 0.80 [ 0.54, 1.05]  | 1.05 [ 0.54, 1.55]   | 0.38                                  | 0.87 [ 0.48, 1.26]   | 0.73 [ 0.22, 1.23]     | 0.66                                      |
| Body fat percentage                  | 1.26 [ 0.92, 1.61]  | 1.37 [ 0.70, 2.04]   | 0.78                                  | 1.27 [ 0.74, 1.80]   | 1.22 [ 0.53, 1.90]     | 0.91                                      |
| Waist circumference                  | 1.75 [ 1.08, 2.43]  | 2.04 [ 0.83, 3.26]   | 0.68                                  | 1.68 [ 0.71, 2.64]   | 1.60 [ 0.32, 2.88]     | 0.92                                      |
| Cholesterol (mmol/L)                 | 0.24 [ 0.18, 0.30]  | 0.15 [ 0.05, 0.26]   | 0.16                                  | 0.15 [ 0.06, 0.23]   | 0.18 [ 0.06, 0.29]     | 0.67                                      |
| LDL (mmol/L)                         | 0.22 [ 0.17, 0.26]  | 0.16 [ 0.08, 0.24]   | 0.22                                  | 0.15 [ 0.08, 0.22]   | 0.13 [ 0.04, 0.22]     | 0.72                                      |
| HDL (mmol/L)                         | 0.00 [-0.02, 0.02]  | -0.01 [-0.05, 0.03]  | 0.64                                  | -0.02 [-0.05, 0.01]  | 0.06 [ 0.02, 0.10]     | 0.0036                                    |
| Triglycerides (mmol/L)               | -0.03 [-0.10, 0.04] | -0.07 [-0.16, 0.01]  | 0.47                                  | 0.00 [-0.08, 0.08]   | -0.11 [-0.24, 0.01]    | 0.15                                      |
| HbA1C (mmol/mol)                     | -0.23 [-0.59, 0.13] | -0.70 [-1.16, -0.23] | 0.12                                  | -0.61 [-1.02, -0.21] | -0.60 [-1.25, 0.05]    | 0.98                                      |

33 Betas and 95% confidence intervals for strata and p-values for Cochran's Q test for heterogeneity between strata pairs (male/female  
 34 and never smokers/current smokers)  
 35

36

37 **Table H. IVW MR stratified analysis for binary variables**

| <b>Outcome</b>             | <b>Male</b>       | <b>Female</b>     | <b>p value sex difference</b> | <b>Never smokers</b> | <b>Current smokers</b> | <b>p value smoking difference</b> |
|----------------------------|-------------------|-------------------|-------------------------------|----------------------|------------------------|-----------------------------------|
| Myocardial infarction      | 1.22 [1.02, 1.47] | 1.17 [0.75, 1.84] | 0.86                          | 1.48 [1.10, 2.01]    | 1.22 [0.94, 1.59]      | 0.35                              |
| Stroke                     | 1.44 [1.16, 1.79] | 1.63 [0.98, 2.69] | 0.67                          | 1.92 [1.30, 2.83]    | 1.25 [0.87, 1.78]      | 0.11                              |
| Ischemic stroke            | 1.18 [0.86, 1.63] | 0.96 [0.44, 2.08] | 0.62                          | 1.30 [0.72, 2.36]    | 0.82 [0.51, 1.33]      | 0.24                              |
| Hemorrhagic stroke         | 1.96 [1.21, 3.18] | 2.66 [0.98, 7.22] | 0.59                          | 5.35 [2.24, 12.78]   | 1.04 [0.49, 2.18]      | 0.01                              |
| Heart failure              | 1.28 [0.94, 1.73] | 0.89 [0.47, 1.71] | 0.33                          | 1.85 [1.09, 3.15]    | 1.36 [0.88, 2.09]      | 0.38                              |
| Atrial fibrillation        | 1.23 [1.06, 1.43] | 1.20 [0.81, 1.78] | 0.90                          | 1.55 [1.16, 2.06]    | 1.17 [0.84, 1.62]      | 0.21                              |
| Type 2 diabetes            | 1.23 [0.80, 1.88] | 1.15 [0.60, 2.21] | 0.88                          | 1.38 [0.79, 2.39]    | 1.27 [0.88, 1.82]      | 0.80                              |
| Any cardiovascular disease | 1.34 [1.18, 1.53] | 1.23 [0.93, 1.63] | 0.58                          | 1.61 [1.32, 1.96]    | 1.29 [1.06, 1.58]      | 0.13                              |
| All-cause death            | 1.38 [1.15, 1.67] | 0.99 [0.68, 1.46] | 0.13                          | 0.95 [0.67, 1.35]    | 1.30 [1.02, 1.67]      | 0.15                              |

38 Odds ratios and 95% confidence intervals for strata and p-values for Cochran's Q test for heterogeneity between strata pairs  
 39 (male/female and never smokers/current smokers)

40



41 **Table I. 2SLS MR stratified analysis for binary variables**

| <b>Outcome</b>             | <b>Male</b>       | <b>Female</b>      | <b>p value sex difference</b> | <b>Never smokers</b> | <b>Current smokers</b> | <b>p value smoking difference</b> |
|----------------------------|-------------------|--------------------|-------------------------------|----------------------|------------------------|-----------------------------------|
| Myocardial infarction      | 1.67 [1.31, 2.12] | 1.13 [0.57, 2.24]  | 0.29                          | 1.88 [1.15, 3.08]    | 1.15 [0.75, 1.78]      | 0.15                              |
| Stroke                     | 1.55 [1.07, 2.25] | 1.59 [0.73, 3.44]  | 0.96                          | 1.59 [0.84, 2.98]    | 1.20 [0.67, 2.17]      | 0.53                              |
| Ischemic stroke            | 1.54 [0.89, 2.65] | 1.02 [0.31, 3.35]  | 0.54                          | 1.46 [0.56, 3.86]    | 0.77 [0.35, 1.66]      | 0.31                              |
| Hemorrhagic stroke         | 1.64 [0.73, 3.70] | 2.25 [0.48, 10.42] | 0.72                          | 2.42 [0.61, 9.57]    | 1.47 [0.41, 5.23]      | 0.60                              |
| Heart failure              | 1.86 [1.23, 2.80] | 0.82 [0.31, 2.15]  | 0.13                          | 1.58 [0.71, 3.52]    | 1.39 [0.70, 2.77]      | 0.81                              |
| Atrial fibrillation        | 1.44 [1.12, 1.85] | 1.12 [0.61, 2.04]  | 0.45                          | 1.35 [0.86, 2.12]    | 1.33 [0.78, 2.27]      | 0.96                              |
| Type 2 diabetes            | 1.36 [1.05, 1.76] | 1.20 [0.68, 2.14]  | 0.70                          | 1.58 [0.99, 2.52]    | 1.07 [0.66, 1.74]      | 0.26                              |
| Any cardiovascular disease | 1.68 [1.40, 2.00] | 1.14 [0.76, 1.72]  | 0.09                          | 1.56 [1.14, 2.15]    | 1.37 [0.99, 1.91]      | 0.57                              |
| All-cause death            | 1.66 [1.24, 2.21] | 0.92 [0.52, 1.64]  | 0.07                          | 0.85 [0.52, 1.39]    | 1.11 [0.75, 1.65]      | 0.40                              |

42 Odds ratios and 95% confidence intervals for strata and p-values for Cochran's Q test for heterogeneity between strata pairs  
 43 (male/female and never smokers/current smokers)

44

45 **Table J. Additional analysis of blood count data by instrument variable group.**

| <b>Variable</b>              | <b>Heterozygous + homozygous group</b> | <b>Wildtype</b> | <b>p-value</b> | <b>F statistic</b> |
|------------------------------|----------------------------------------|-----------------|----------------|--------------------|
| Hemoglobin (g/dL)            | 14.23                                  | 14.21           | 0.0179         | 5.6                |
| Hematocrit (%)               | 41.24                                  | 41.15           | 0.00237        | 9.2                |
| Mean corpuscular volume (fL) | 91.08                                  | 91.35           | 2.37e-13       | 53.7               |

46 Mean for each value by instrument variable status; p-value and F statistic from ANOVA.
