# Supplementary material for: Alcohol use and cardiometabolic risk in the UK Biobank: A Mendelian randomization study
Source: PubMed Central journal article supplement (PMC8357114; doi:10.1371/journal.pone.0255801), 2021-08-11
Supplement: pone.0255801.s006.pdf [file pone.0255801.s006.pdf]

| <b>Name</b>                                                 | <b>Extracted summary statistics for phenotypes</b>                     | <b>Population ancestry</b> | <b>n (cases, where applicable)</b>    | <b>From</b>                                                                                                                                                                                                              |
|-------------------------------------------------------------|------------------------------------------------------------------------|----------------------------|---------------------------------------|--------------------------------------------------------------------------------------------------------------------------------------------------------------------------------------------------------------------------|
| CARDIoGRAMplusC4D with 1000 genomes GWAS meta-analysis [27] | Myocardial infarction                                                  | Mixed                      | 184,305 (60,801)                      | <a href="http://www.cardiogramplusc4d.org/data-downloads/">http://www.cardiogramplusc4d.org/data-downloads/</a>                                                                                                          |
| MEGASTROKE [28]                                             | All stroke, Ischemic stroke                                            | European                   | 446,696 (67,162);<br>440,328 (60,341) | <a href="https://www.ebi.ac.uk/gwas/studies/GCST006906">https://www.ebi.ac.uk/gwas/studies/GCST006906</a> ,<br><a href="https://www.ebi.ac.uk/gwas/studies/GCST006908">https://www.ebi.ac.uk/gwas/studies/GCST006908</a> |
| HERMES Heart Failure GWAS* [29]                             | Heart failure                                                          | European                   | 972,032 (47,309)                      | CVDKP                                                                                                                                                                                                                    |
| 2018 AF HRC GWAS [30]                                       | Atrial fibrillation                                                    | Mixed                      | 588,190 (65,446)                      | CVDKP                                                                                                                                                                                                                    |
| DIAMANTE T2D exome chip meta-analysis* [31]                 | Type 2 diabetes                                                        | European                   | 298,957 (48,286)                      | <a href="http://diagram-consortium.org/downloads.html">http://diagram-consortium.org/downloads.html</a>                                                                                                                  |
| DIAGRAM 1000G GWAS [32]                                     | Type 2 diabetes                                                        | European                   | 159,208 (26,676)                      | <a href="http://diagram-consortium.org/downloads.html">http://diagram-consortium.org/downloads.html</a>                                                                                                                  |
| FinnMetSeq exome sequence analysis [33]                     | Systolic blood pressure, diastolic blood pressure, body fat percentage | European                   | 19,291                                | T2DKP                                                                                                                                                                                                                    |
| MAGIC GWAS [34]                                             | HbA1C                                                                  | European                   | 123,665                               | <a href="http://magicinvestigators.org/downloads/">http://magicinvestigators.org/downloads/</a>                                                                                                                          |
| GIANT 2018 BMI, Height exome chip analysis [35]             | BMI                                                                    | European                   | 449,889                               | <a href="https://portals.broadinstitute.org/collaboration/giant/index.php/GIANT_consortium_data_files">https://portals.broadinstitute.org/collaboration/giant/index.php/GIANT_consortium_data_files</a>                  |

| <b>Name</b>                                            | <b>Extracted summary statistics for phenotypes</b> | <b>Population ancestry</b> | <b>n (cases, where applicable)</b> | <b>From</b>                                                                                                                                                                                             |
|--------------------------------------------------------|----------------------------------------------------|----------------------------|------------------------------------|---------------------------------------------------------------------------------------------------------------------------------------------------------------------------------------------------------|
| GIANT 2012 GWAS [36]                                   | BMI                                                | European                   | 133,154                            | <a href="https://portals.broadinstitute.org/collaboration/giant/index.php/GIANT_consortium_data_files">https://portals.broadinstitute.org/collaboration/giant/index.php/GIANT_consortium_data_files</a> |
| GIANT 2015 GWAS [37]                                   | Waist circumference                                | European                   | 232,101                            | <a href="https://portals.broadinstitute.org/collaboration/giant/index.php/GIANT_consortium_data_files">https://portals.broadinstitute.org/collaboration/giant/index.php/GIANT_consortium_data_files</a> |
| International Consortium on Blood Pressure (ICBP) [38] | Systolic and diastolic blood pressure              | European                   | 201,529                            | <a href="https://www.ncbi.nlm.nih.gov/projects/gap/cgi-bin/analysis.cgi?study_id=phs000585.v2.p1">https://www.ncbi.nlm.nih.gov/projects/gap/cgi-bin/analysis.cgi?study_id=phs000585.v2.p1</a>           |
| EXTEND GWAS [39]                                       | Waist circumference                                | European                   | 7,159                              | T2DKP                                                                                                                                                                                                   |
| Body fat percentage GWAS [40]                          | Body fat percentage                                | Mixed (89,267 European)    | 100,716                            | <a href="https://www.ebi.ac.uk/gwas/studies/GCST003435">https://www.ebi.ac.uk/gwas/studies/GCST003435</a>                                                                                               |
| GLGC exome chip analysis [41]                          | Total cholesterol, LDL, HDL, triglycerides         | Mixed (273,050 European)   | ~300,000                           | <a href="http://csg.sph.umich.edu/willer/public/lipids2017/">http://csg.sph.umich.edu/willer/public/lipids2017/</a>                                                                                     |
| GLGC 2013 GWAS [42]                                    | Total cholesterol, LDL, HDL, triglycerides         | European                   | 188,577                            | <a href="https://www.ebi.ac.uk/gwas/publications/24097068">https://www.ebi.ac.uk/gwas/publications/24097068</a>                                                                                         |
