# Supplementary material for: Alcohol use and cardiometabolic risk in the UK Biobank: A Mendelian randomization study
Source: PubMed Central journal article supplement (PMC8357114; doi:10.1371/journal.pone.0255801), 2021-08-11
Supplement: pone.0255801.s007.pdf [file pone.0255801.s007.pdf]

| <b>Variable</b>        | <b>MR - total</b> | <b>MR - male</b> | <b>MR - female</b> | <b>MR - nonsmokers</b> | <b>MR - smokers</b> |
|------------------------|-------------------|------------------|--------------------|------------------------|---------------------|
| n                      | 337484            | 156248           | 181236             | 183826                 | 33977               |
| Sex                    |                   |                  |                    |                        |                     |
| Female                 | 181236 (53.7)     | 0 (0)            | 181236 (100)       | 107418 (58.4)          | 15577 (45.8)        |
| Male                   | 156248 (46.3)     | 156248 (100)     | 0 (0)              | 76408 (41.6)           | 18400 (54.2)        |
| Age (years)            | 67.6 (8)          | 67.9 (8.1)       | 67.4 (7.9)         | 66.9 (8.1)             | 65.9 (8.1)          |
| Region                 |                   |                  |                    |                        |                     |
| England                | 297645 (88.2)     | 138232 (88.5)    | 159413 (88)        | 161683 (88)            | 29350 (86.4)        |
| Wales                  | 14824 (4.4)       | 6822 (4.4)       | 8002 (4.4)         | 8236 (4.5)             | 1614 (4.8)          |
| Scotland               | 25015 (7.4)       | 11194 (7.2)      | 13821 (7.6)        | 13907 (7.6)            | 3013 (8.9)          |
| Townsend index         | -1.6 (2.9)        | -1.5 (3)         | -1.6 (2.9)         | -1.9 (2.7)             | -0.1 (3.5)          |
| Ethnic group           |                   |                  |                    |                        |                     |
| White                  | 337484 (100)      | 156248 (100)     | 181236 (100)       | 183826 (100)           | 33977 (100)         |
| Asian or Asian British | 0 (0)             | 0 (0)            | 0 (0)              | 0 (0)                  | 0 (0)               |
| Black or Black British | 0 (0)             | 0 (0)            | 0 (0)              | 0 (0)                  | 0 (0)               |
| Mixed or other         | 0 (0)             | 0 (0)            | 0 (0)              | 0 (0)                  | 0 (0)               |
| Don't know/refused     | 0 (0)             | 0 (0)            | 0 (0)              | 0 (0)                  | 0 (0)               |
| Smoking status         |                   |                  |                    |                        |                     |
| Never-smoker           | 183826 (54.5)     | 76408 (48.9)     | 107418 (59.3)      | 183826 (100)           | 0 (0)               |
| Current smoker         | 33977 (10.1)      | 18400 (11.8)     | 15577 (8.6)        | 0 (0)                  | 33977 (100)         |
| Former smoker          | 118505 (35.1)     | 60883 (39)       | 57622 (31.8)       | 0 (0)                  | 0 (0)               |
| No response            | 1176 (0.3)        | 557 (0.4)        | 619 (0.3)          | 0 (0)                  | 0 (0)               |
| Drinking status        |                   |                  |                    |                        |                     |

|                                             |               |              |              |               |              |
|---------------------------------------------|---------------|--------------|--------------|---------------|--------------|
| Never-drinker                               | 10392 (3.1)   | 2623 (1.7)   | 7769 (4.3)   | 8234 (4.5)    | 674 (2)      |
| Current drinker                             | 315257 (93.4) | 148479 (95)  | 166778 (92)  | 170381 (92.7) | 31430 (92.5) |
| Former drinker                              | 11543 (3.4)   | 5017 (3.2)   | 6526 (3.6)   | 5084 (2.8)    | 1806 (5.3)   |
| No response                                 | 292 (0.1)     | 129 (0.1)    | 163 (0.1)    | 127 (0.1)     | 67 (0.2)     |
| Drinking frequency                          |               |              |              |               |              |
| Daily or almost daily                       | 72270 (21.4)  | 41339 (26.5) | 30931 (17.1) | 30020 (16.3)  | 9136 (26.9)  |
| Three or four times a week                  | 81462 (24.1)  | 42266 (27.1) | 39196 (21.6) | 44049 (24)    | 6542 (19.3)  |
| Once or twice a week                        | 88747 (26.3)  | 40983 (26.2) | 47764 (26.4) | 52425 (28.5)  | 7865 (23.1)  |
| One to three times a month                  | 37367 (11.1)  | 13662 (8.7)  | 23705 (13.1) | 22816 (12.4)  | 3720 (10.9)  |
| Special occasions only                      | 35411 (10.5)  | 10229 (6.5)  | 25182 (13.9) | 21071 (11.5)  | 4167 (12.3)  |
| Never                                       | 21991 (6.5)   | 7656 (4.9)   | 14335 (7.9)  | 13354 (7.3)   | 2491 (7.3)   |
| No response                                 | 236 (0.1)     | 113 (0.1)    | 123 (0.1)    | 91 (0)        | 56 (0.2)     |
| Alcohol (weekly equivalent glasses of wine) | 8.1 (9.5)     | 11.1 (11.2)  | 5.4 (6.6)    | 6.5 (7.8)     | 10.9 (13.3)  |
| Systolic blood pressure (mmHg)              | 140.2 (19.7)  | 143.2 (18.5) | 137.6 (20.3) | 139.7 (19.5)  | 137.5 (19.5) |
| Diastolic blood pressure (mmHg)             | 82.2 (10.7)   | 84.1 (10.5)  | 80.6 (10.5)  | 82.2 (10.6)   | 81.6 (10.9)  |
| Body mass index (kg/m <sup>2</sup> )        | 27.4 (4.7)    | 27.8 (4.2)   | 27 (5.1)     | 27.1 (4.7)    | 27.1 (4.8)   |
| Waist circumference (cm)                    | 90.3 (13.5)   | 97 (11.3)    | 84.6 (12.5)  | 88.7 (13.2)   | 91.2 (13.5)  |
| Body fat percentage                         | 31.4 (8.5)    | 25.3 (5.8)   | 36.6 (6.9)   | 31.4 (8.6)    | 29.9 (8.6)   |
| Cholesterol (mmol/L)                        | 5.7 (1.1)     | 5.5 (1.1)    | 5.9 (1.1)    | 5.7 (1.1)     | 5.7 (1.2)    |
| LDL (mmol/L)                                | 3.6 (0.9)     | 3.5 (0.9)    | 3.6 (0.9)    | 3.6 (0.9)     | 3.6 (0.9)    |
| HDL (mmol/L)                                | 1.5 (0.4)     | 1.3 (0.3)    | 1.6 (0.4)    | 1.5 (0.4)     | 1.4 (0.4)    |
| Triglycerides (mmol/L)                      | 1.8 (1)       | 2 (1.1)      | 1.6 (0.9)    | 1.7 (1)       | 2 (1.2)      |

|                            |               |               |               |               |              |
|----------------------------|---------------|---------------|---------------|---------------|--------------|
| HbA1c (mmol/mol)           | 36 (6.5)      | 36.3 (7.3)    | 35.7 (5.7)    | 35.5 (6)      | 37.1 (7.2)   |
| Glucose (mmol/L)           | 5.1 (1.2)     | 5.2 (1.4)     | 5.1 (1)       | 5.1 (1.1)     | 5.1 (1.2)    |
| Type 2 diabetes            | 15493 (4.6)   | 9879 (6.3)    | 5614 (3.1)    | 6402 (3.5)    | 1715 (5)     |
| Coronary heart disease     | 16102 (4.8)   | 12260 (7.8)   | 3842 (2.1)    | 6057 (3.3)    | 2274 (6.7)   |
| All stroke                 | 8044 (2.4)    | 4825 (3.1)    | 3219 (1.8)    | 3498 (1.9)    | 1193 (3.5)   |
| Ischemic stroke            | 3427 (1)      | 2195 (1.4)    | 1232 (0.7)    | 1434 (0.8)    | 561 (1.7)    |
| Hemorrhagic stroke         | 1877 (0.6)    | 1002 (0.6)    | 875 (0.5)     | 811 (0.4)     | 278 (0.8)    |
| Heart failure              | 5921 (1.8)    | 4116 (2.6)    | 1805 (1)      | 2145 (1.2)    | 920 (2.7)    |
| Atrial fibrillation        | 15483 (4.6)   | 10425 (6.7)   | 5058 (2.8)    | 6766 (3.7)    | 1530 (4.5)   |
| Any cardiovascular disease | 35499 (10.5)  | 24023 (15.4)  | 11476 (6.3)   | 14911 (8.1)   | 4532 (13.3)  |
| All-cause death            | 13700 (4.1)   | 8410 (5.4)    | 5290 (2.9)    | 5102 (2.8)    | 2696 (7.9)   |
| ADH1B status               |               |               |               |               |              |
| Wildtype                   | 322519 (95.6) | 149158 (95.5) | 173361 (95.7) | 175669 (95.6) | 32518 (95.7) |
| Carrier                    | 14777 (4.4)   | 7013 (4.5)    | 7764 (4.3)    | 8056 (4.4)    | 1441 (4.2)   |
| Homozygous minor allele    | 188 (0.1)     | 77 (0)        | 111 (0.1)     | 101 (0.1)     | 18 (0.1)     |
